# Supplementary material for: Continental‐scale dynamics of avian influenza in U.S. waterfowl are driven by demography, migration, and temperature
Source: PubMed Central journal article supplement (PMC7988533; doi:10.1002/eap.2245), 2020-11-22
Supplement: EAP-31-e2245-s002.pdf [file EAP-31-e2245-s002.pdf]

**Supporting Information.** Gorsich, E.E., C.T. Webb, A.A. Merton, J.A. Hoeting, R.S. Miller, M.L. Farnsworth, S.R. Swafford, T.J. DeLiberto, K. Pedersen, A.B. Franklin, R.G. McLean, K.R. Wilson, and P.F. Doherty, Jr. 2020. Continental-scale dynamics of avian influenza in U.S. waterfowl are driven by demography, migration, and temperature. *Ecological Applications*.

Video S1. Total banding flow at each spatial location animated across a biological year at a monthly time scale. Circle area is proportional to the number of birds banded. The movie illustrates that banding flow captures early season movement.
