# Supplementary material for: Continental‐scale dynamics of avian influenza in U.S. waterfowl are driven by demography, migration, and temperature
Source: PubMed Central journal article supplement (PMC7988533; doi:10.1002/eap.2245), 2020-11-22
Supplement: EAP-31-e2245-s004.pdf [file EAP-31-e2245-s004.pdf]

**Supporting Information.** Gorsich, E.E., C.T. Webb, A.A. Merton, J.A. Hoeting, R.S. Miller, M.L. Farnsworth, S.R. Swafford, T.J. DeLiberto, K. Pedersen, A.B. Franklin, R.G. McLean, K.R. Wilson, and P.F. Doherty, Jr. 2020. Continental-scale dynamics of avian influenza in U.S. waterfowl are driven by demography, migration, and temperature. *Ecological Applications*.

### **APPENDIX S3. ADDITIONAL RESULTS FIGURES AND TABLES**

Table S1. Summary of selected logistic regression models from each hypothesis tested. Columns correspond to the hypothesis, number of parameters (np), and the model structure after model selection (Model). All models predict the probability that an individual bird is AIV positive or negative (AIV). The selected model was the Multiple mechanisms model based on AICc (Table 1, main text). Appropriate main effects and lower level interactions were included. Hypothesis numbers refer to their display in Figure 1 and Table 1.

| <b>Hypothesis</b>           | <b>np</b> | <b>Model</b>                                                                                                                              |
|-----------------------------|-----------|-------------------------------------------------------------------------------------------------------------------------------------------|
| (1) demography              | 3         | AIV ~ age + sex                                                                                                                           |
| (2) environmental reservoir | 35        | AIV ~ flow×temperature polynomial                                                                                                         |
| (3) hot spots               | 28        | AIV ~ latitude×longitude×temperature polynomial                                                                                           |
| (4) contact network         | 13        | AIV ~ flow + cluster identification + bridging index + MST                                                                                |
| (5) multiple mechanisms     | 64        | AIV ~ age + cluster identification + bridging index + MST +<br>flow×temperature polynomial +<br>latitude×longitude×temperature polynomial |

**Parameter key for table C1.**

|                        |                                                                 |
|------------------------|-----------------------------------------------------------------|
| temperature polynomial | $T_0 + T_0^2 + T_0^3 + \Delta T + \Delta T^2 + \Delta T^3$      |
| where $T_0$            | weekly average minimum temperature                              |
| $\Delta T$             | change in weekly average minimum temperature from previous week |
| flow                   | BHY + BAHY + RHY + RAHY                                         |
| where BHY              | banding flow for hatch-year birds (four-week window)            |
| BAHY                   | banding flow for after hatch-year birds                         |
| RHY                    | recovery flow for hatch-year birds                              |
| RAHY                   | recovery flow for after hatch-year bird                         |
| MST                    | minimum spanning trees index                                    |

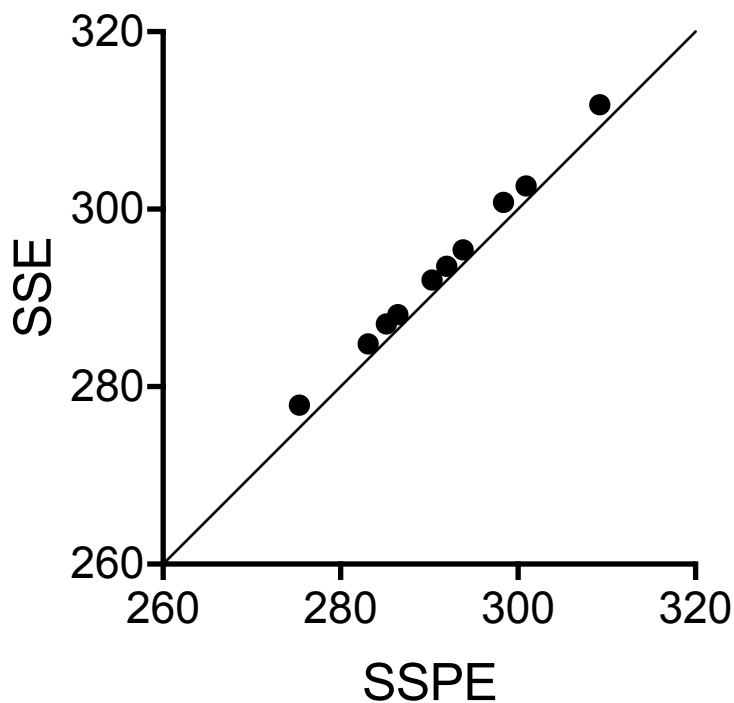

Figure S1. Cross-validation summary plot of error sum of squares (SSE) and pure error sum of squares (SSPE). The 1:1 line is plotted for comparison. To conduct cross-validation, we randomly separated the data into 10 equal partitions. We re-fit the model in Table C3 using nine of the partitions, predicted the response for the excluded partition, and repeated this procedure for all ten combinations to calculate the error sum of squares (SSE) and the pure error sum of squares (SSPE) for each partition. SSPE is calculated by summing the squared difference between each observed response from the averaged observed response at a given predictor value. Because SSPE quantifies the proportion of SSE due to random error rather than lack of fit error, the model is appropriate because the SSPE is a large component of the SSE.

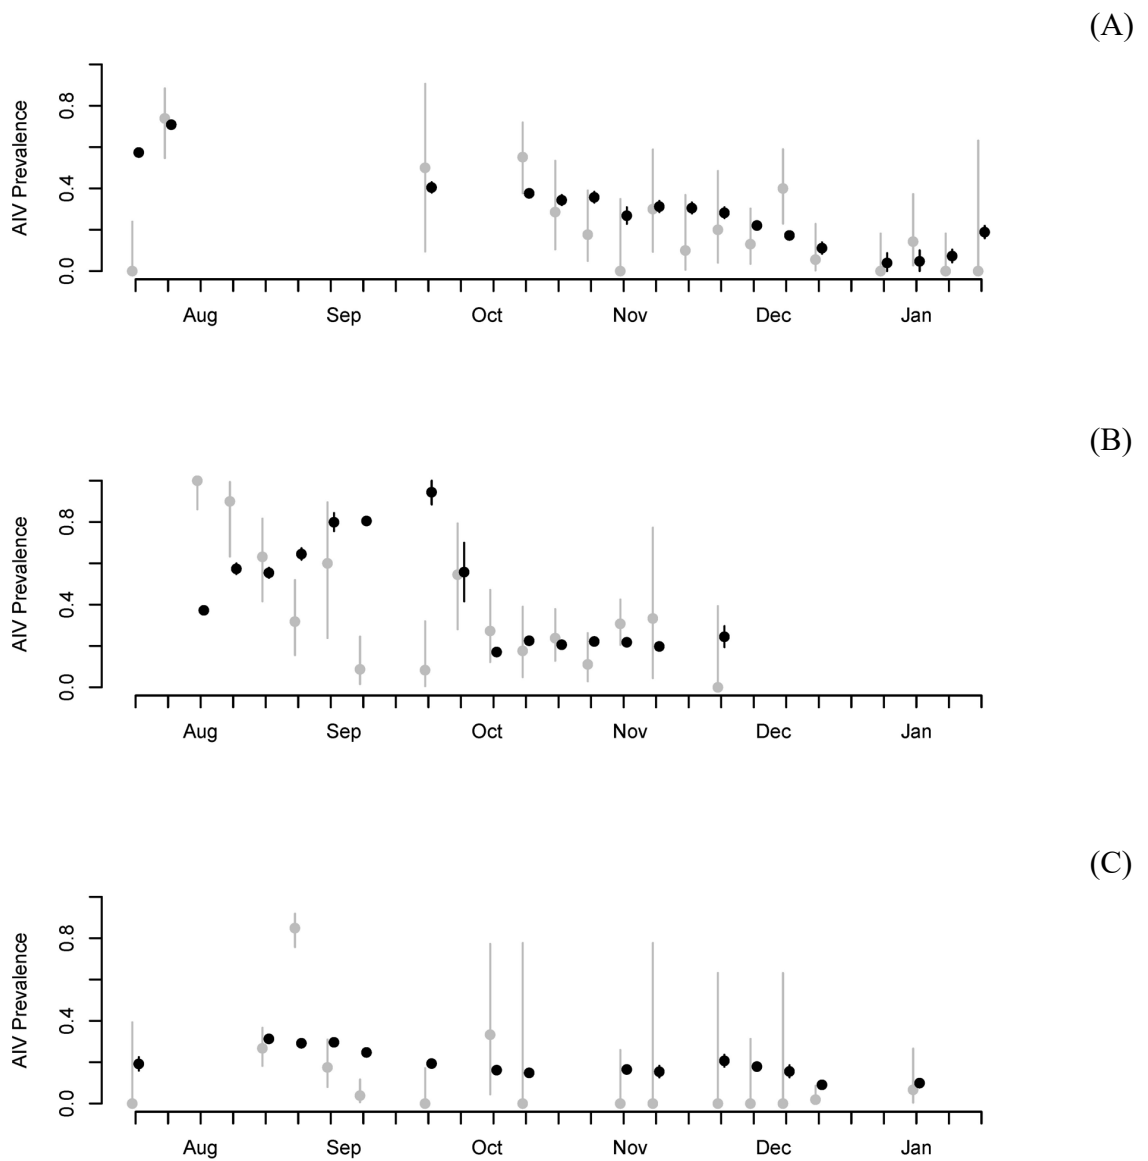

Figure S2. Out-of-sample validation. Comparison between the observed data from 2009 (light grey) and model predictions for 2009 (black) across time at three distinct nodes. Model predictions are based on parameter estimates from fitting to the 2007-2008 data and covariates for the 2009 biological year. (A) Node D in Figure 3 (Pacific Northwest). (B) Node E in Figure 3 (Northern central plains). (C) Node F in Figure 3 (Southern New England).

Table S2. Parameter estimates for the selected model for the multiple mechanisms hypothesis.

|                             | <b>Estimate</b> | <b>Std. Error</b> | <b>z value</b> | <b>Pr(&gt; z )</b> |     |
|-----------------------------|-----------------|-------------------|----------------|--------------------|-----|
| Intercept                   | -8.26E+00       | 1.07E+02          | -0.077         | 0.938              |     |
| Age (hatch year)            | 5.17E-01        | 4.01E-02          | 12.909         | 0.000              | *** |
| Northeast Cluster           | 1.03E+01        | 1.07E+02          | 0.096          | 0.924              |     |
| California Cluster          | 1.05E+01        | 1.07E+02          | 0.098          | 0.922              |     |
| West/Pacific Cluster        | 1.07E+01        | 1.07E+02          | 0.100          | 0.920              |     |
| Mississippi Valley Cluster  | 1.02E+01        | 1.07E+02          | 0.096          | 0.924              |     |
| Ohio Valley Cluster         | 1.02E+01        | 1.07E+02          | 0.096          | 0.924              |     |
| Florida Cluster             | -8.91E-01       | 2.52E+02          | -0.004         | 0.997              |     |
| Bridging index              | 3.75E-01        | 2.07E-01          | 1.815          | 0.069              | .   |
| T <sub>0</sub>              | 2.99E+00        | 6.69E-01          | 4.472          | 0.000              | *** |
| ΔT                          | 4.04E+01        | 9.44E+00          | 4.281          | 0.000              | *** |
| T <sub>0</sub> <sup>2</sup> | -7.33E-02       | 1.02E-01          | -0.718         | 0.473              |     |
| ΔT <sup>2</sup>             | 7.67E+00        | 1.11E+01          | 0.694          | 0.488              |     |
| T <sub>0</sub> <sup>3</sup> | -1.56E-02       | 6.64E-03          | -2.350         | 0.019              | *   |
| ΔT <sup>3</sup>             | -6.23E+00       | 3.82E+00          | -1.629         | 0.103              |     |
| BHY                         | 5.35E+01        | 6.44E+01          | 0.831          | 0.406              |     |
| BAHY                        | -5.76E+01       | 5.88E+01          | -0.979         | 0.328              |     |
| RHY                         | 2.54E+01        | 2.39E+01          | 1.064          | 0.287              |     |
| RAHY                        | 2.57E+01        | 1.75E+01          | 1.464          | 0.143              |     |
| Latitude                    | -4.16E-02       | 1.25E-01          | -0.332         | 0.740              |     |
| Longitude                   | 1.01E-01        | 5.35E-02          | 1.891          | 0.059              | .   |
| BHY*T <sub>0</sub>          | -7.77E+00       | 2.12E+01          | -0.367         | 0.714              |     |

|                                  |           |          |        |       |     |
|----------------------------------|-----------|----------|--------|-------|-----|
| BAHY*T <sub>0</sub>              | 2.71E+01  | 2.23E+01 | 1.216  | 0.224 |     |
| RHY*T <sub>0</sub>               | 7.78E-01  | 4.96E+00 | 0.157  | 0.875 |     |
| RAHY*T <sub>0</sub>              | 1.79E+00  | 7.15E+00 | 0.250  | 0.803 |     |
| BHY*ΔT                           | -7.32E+01 | 2.65E+01 | -2.765 | 0.006 | **  |
| BAH*ΔT                           | 3.37E+02  | 1.08E+02 | 3.115  | 0.002 | **  |
| RHY*ΔT                           | 5.27E+01  | 6.17E+01 | 0.854  | 0.393 |     |
| RAHY*ΔT                          | -3.57E+01 | 4.15E+01 | -0.861 | 0.389 |     |
| BHY*T <sub>0</sub> <sup>2</sup>  | 3.78E+00  | 2.38E+00 | 1.593  | 0.111 |     |
| BAHY*T <sub>0</sub> <sup>2</sup> | -5.80E+00 | 3.14E+00 | -1.848 | 0.065 | .   |
| RHY*T <sub>0</sub> <sup>2</sup>  | -3.03E-01 | 7.59E-01 | -0.399 | 0.690 |     |
| RAHY*T <sub>0</sub> <sup>2</sup> | -1.22E+00 | 1.24E+00 | -0.981 | 0.326 |     |
| BHY*ΔT <sup>2</sup>              | -2.36E+02 | 5.20E+01 | -4.533 | 0.000 | *** |
| BAHY*ΔT <sup>2</sup>             | 4.49E+02  | 1.34E+02 | 3.340  | 0.001 | *** |
| RHY*ΔT <sup>2</sup>              | 9.11E+01  | 6.93E+01 | 1.316  | 0.188 |     |
| RAHY*ΔT <sup>2</sup>             | -1.75E+02 | 6.08E+01 | -2.881 | 0.004 | **  |
| BHY*T <sub>0</sub> <sup>3</sup>  | -2.31E-01 | 8.65E-02 | -2.673 | 0.008 | **  |
| BAHY*T <sub>0</sub> <sup>3</sup> | 3.37E-01  | 1.35E-01 | 2.505  | 0.012 | *   |
| RHY*T <sub>0</sub> <sup>3</sup>  | 3.84E-02  | 8.76E-02 | 0.439  | 0.661 |     |
| RAHY*T <sub>0</sub> <sup>3</sup> | -1.80E-01 | 1.53E-01 | -1.174 | 0.241 |     |
| BHY*ΔT <sup>3</sup>              | -1.01E+02 | 2.66E+01 | -3.795 | 0.000 | *** |
| BAHY*ΔT <sup>3</sup>             | 1.47E+02  | 4.97E+01 | 2.952  | 0.003 | **  |
| RHY*ΔT <sup>3</sup>              | 3.62E+01  | 2.26E+01 | 1.602  | 0.109 |     |
| RAHY*ΔT <sup>3</sup>             | -8.04E+01 | 2.57E+01 | -3.125 | 0.002 | **  |
| Latitude*Longitude               | -1.73E-03 | 1.24E-03 | -1.396 | 0.163 |     |

|                                  |           |          |        |       |     |
|----------------------------------|-----------|----------|--------|-------|-----|
| $T_0$ *Latitude                  | -7.29E-02 | 1.58E-02 | -4.616 | 0.000 | *** |
| $\Delta T$ *Latitude             | -9.19E-01 | 2.26E-01 | -4.061 | 0.000 | *** |
| $T_0^2$ *Latitude                | 1.45E-03  | 2.37E-03 | 0.612  | 0.541 |     |
| $\Delta T^2$ *Latitude           | -1.72E-01 | 2.60E-01 | -0.662 | 0.508 |     |
| $T_0^3$ *Latitude                | 3.91E-04  | 1.56E-04 | 2.500  | 0.012 | *   |
| $\Delta T^3$ *Latitude           | 1.41E-01  | 8.93E-02 | 1.579  | 0.114 |     |
| $T_0$ *Longitude                 | 2.61E-02  | 6.57E-03 | 3.970  | 0.000 | *** |
| $\Delta T$ *Longitude            | 3.94E-01  | 9.50E-02 | 4.152  | 0.000 | *** |
| $T_0^2$ *Longitude               | -1.19E-03 | 1.02E-03 | -1.169 | 0.243 |     |
| $\Delta T^2$ *Longitude          | 6.41E-02  | 1.13E-01 | 0.569  | 0.569 |     |
| $T_0^3$ *Longitude               | -1.06E-04 | 6.41E-05 | -1.647 | 0.100 | .   |
| $\Delta T^3$ *Longitude          | -6.80E-02 | 3.93E-02 | -1.730 | 0.084 | .   |
| $T_0$ *Latitude*Longitude        | -6.52E-04 | 1.55E-04 | -4.204 | 0.000 | *** |
| $\Delta T$ *Latitude*Longitude   | -8.74E-03 | 2.25E-03 | -3.886 | 0.000 | *** |
| $T_0^2$ *Latitude*Longitude      | 2.52E-05  | 2.36E-05 | 1.065  | 0.287 |     |
| $\Delta T^2$ *Latitude*Longitude | -1.34E-03 | 2.64E-03 | -0.509 | 0.611 |     |
| $T_0^3$ *Latitude*Longitude      | 2.71E-06  | 1.51E-06 | 1.795  | 0.073 | .   |
| $\Delta T^3$ *Latitude*Longitude | 1.54E-03  | 9.11E-04 | 1.693  | 0.090 | .   |

---

Significance codes: 0 '\*\*\*' 0.001 '\*\*' 0.01 '\*' 0.05 '.'
